# Supplementary material for: Silk Spinning in Silkworms and Spiders
Source: PubMed Central journal article supplement (PMC5000687; doi:10.3390/ijms17081290), 2016-08-09
Supplement: ijms-17-01290-s001.pdf [file ijms-17-01290-s001.pdf]

# Supplementary Materials: Silk Spinning in Silkworms and Spiders

Marlene Andersson, Jan Johansson and Anna Rising

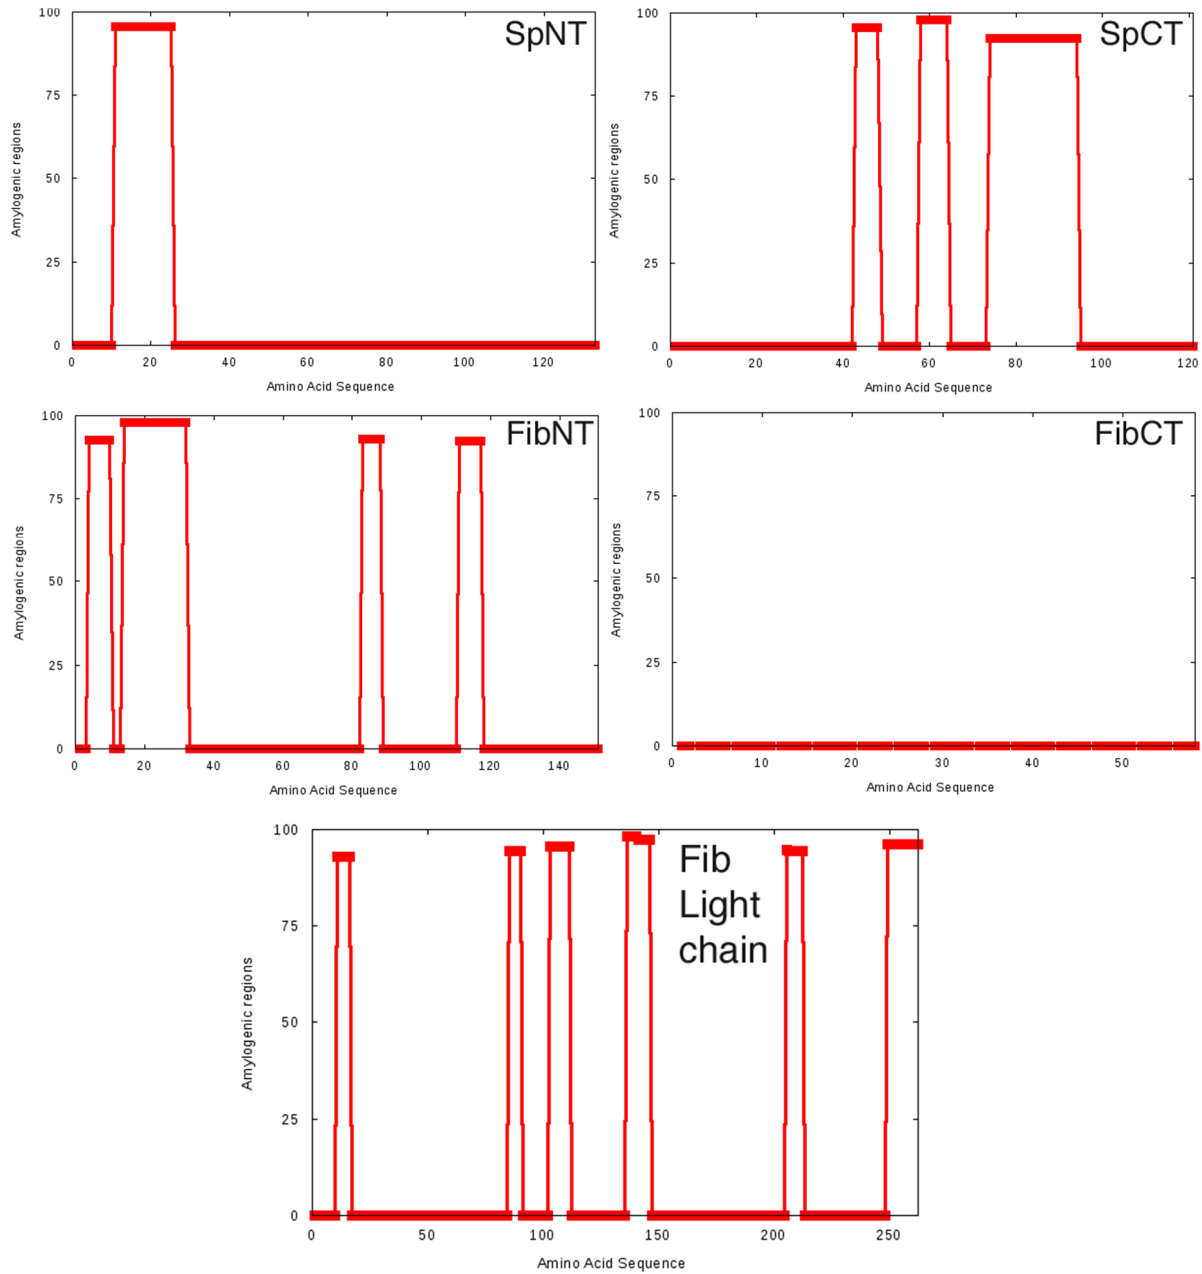

**Figure S1.** Waltz plots of spidroin NT (SpNT), spidroin CT (SpCT), fibroin heavy chain NT (FibNT), fibroin heavy chain CT (FibCT) and fibroin light chain.
